# Supplementary material for: Skeletal Muscle Resident Progenitor Cells Coexpress Mesenchymal and Myogenic Markers and Are Not Affected by Chronic Heart Failure-Induced Dysregulations
Source: Hindawi journal article supplement (doi:10.1155/2019/5690345), 2019-01-03
Supplement: f1 [file 5690345.f1.pdf]

Table S1. List of primers used in Q-PCR experiments

| GENE NAME | Forward primer            | Reverse primer          |
|-----------|---------------------------|-------------------------|
| hGAPDH    | AATGAAGGGGTCATTGATGG      | AAGGTGAAGGTCGGAGTCAA    |
| hMYH1     | CACCACCAACCCATACGATTA     | GGCACTATCTGTAGCCATCAA   |
| hMYH3     | GTGGTGGACTCAAAGGAAGAA     | GGTCCTGTTGTCCTCAGTTT    |
| hMYH7     | GACCTCAAGAAGGATGTCTTCG    | GGTCACTGTCTTGCCATACTC   |
| hMYH8     | TTTCCACCAAGAACCAGAG       | CACTCATGGCTGCGATTTATTT  |
| hMYH9     | CAGGGCTCATCTACACCTATTC    | GCCCTTGACATTTCCACAATC   |
| hMYH10    | GGGCCAACATTGAAACATACC     | TTCTCCTGCTCCAGATAACAAC  |
| TNNC1     | AGAGCAGCTGACAGAAGA        | GCTCCTTGGTGCTGATG       |
| hMYH6     | CACCAACAATCCCTACGACTAC    | AGCACGTCAAAGGCACTATC    |
| TNNI2     | CATGTCTGAAGTGCAGGAG       | AGCTCCTTGCTGGTCTT       |
| hPGC-1a   | GCTCTGTGTCACTGTGGATT      | CACACTCGATGTCACTCCATAC  |
| hSCD1     | AGGACGATATCTCTAGCTCCTATAC | GGCATCGTCTCCAATTATCT    |
| hGOS      | CCGTGCCACTAAGGTCATT       | ACGTACAGCTTCACCATCTTC   |
| hCD36     | GGCTGTGTTTGGAGGTATTCTA    | TTGTACCTTCTTCGAGGACAAC  |
| hPLIN2    | CAGTAGTCGTACAGCATCTT      | CAGTAGTCGTACAGCATCTT    |
| hPLIN3    | ACACAAGCTCCTTGGTGTC       | ACACAAGCTCCTTGGTGTC     |
| hLXRa     | TTGGACAGTGCCTTGGTAAT      | CGCAGAGTCAGGAGGAATG     |
| hCPT1b    | GCTATGTGTATCCGCCTTCTATC   | GACTCTAGGTACCGCTGAATTG  |
| hCGI58    | CAGCGTTTAAGGCCTGATTTT     | CCACTTGGAGTCTGCACATTA   |
| hATGL     | TGTCTGCAGCGGTTTCAT        | CTCATAGAGTGGCAGGTTGTC   |
| hMCAD     | CAGATCCTAAAGCTCCTGCTAAT   | GGCCCATGTTTAATTCCTTCTC  |
| hERRa     | ATGGTGTGGCATCCTGTG        | CTTGGTGATCTCACACTCGTT   |
| hDGAT1    | CTGGAGAACCTCATCAAGTATGG   | CAAAGACATTGGCCGCAATAA   |
| hPPARa    | CAAGGCCTCAGGCTATCATTAC    | GTCGCACTGTGCATACACCA    |
| hPPARg    | AGCCTTCCAACCTCCCTCATGGCA  | TCCGGAAGAAACCCTTGCATCCT |
| hGLUT1    | GACGTAGGGACCACACAGTTGC    | CCAGCTGCCATTGCCGTT      |
| NPRA      | CGTGTGAACCGTAAACGCATT     | CATTCTGCACATCCCGCATA    |
| NPRB      | TTCAAGGGAAATGTTGTGCGCC    | AACAGAACCTGCCGGGTCA     |
| NPRC      | CCCAGGAGGTTATTGGTGATTATTT | ACATTCGGCCGCATTTCAA     |
| aP2       | GCCAGGAATTTGACGAAGTC      | TGGTTGATTTCCATCCCAT     |

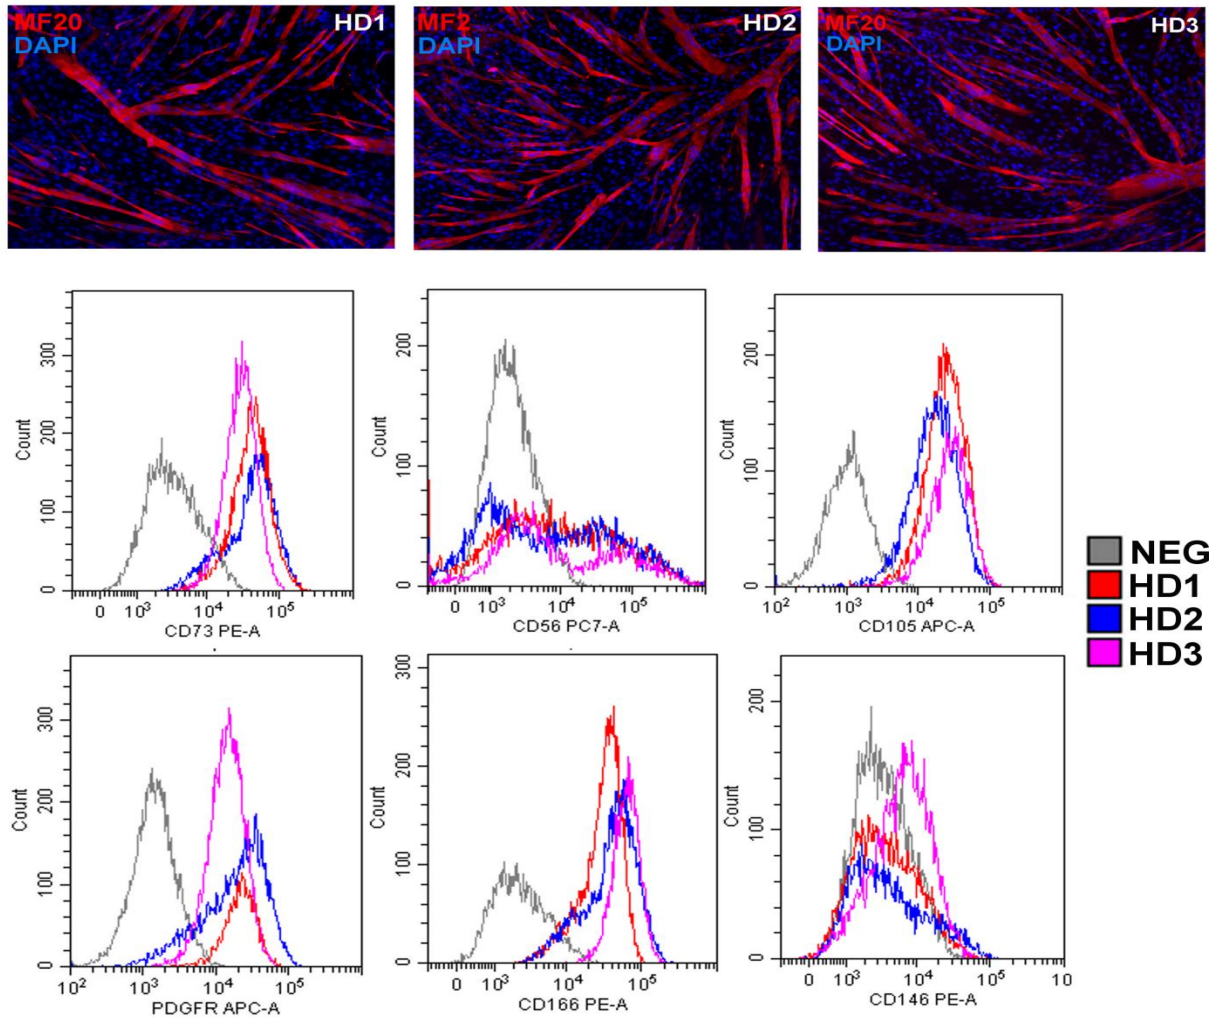

Figure S1. SM-MPC from HD demonstrate the consistent response to stimulation of myogenic differentiation and similarities in immunophenotypes.

Upper panel: Immunocytochemical visualization of differentiated myotubes in HD - derived samples: myotubes were stained for expression of MyHC with antibody that recognize the heavy chain of myosin II (MF20). Nuclei were labelled with DAPI (blue).

Lower panel: Histograms demonstrate results of FACS surface marker analysis of SM-MPC derived from HD.
